# Supplementary material for: Efficient genome editing of genes involved in neural crest development using the CRISPR/Cas9 system in Xenopus embryos
Source: PubMed Central journal article supplement (PMC4818404; doi:10.1186/s13578-016-0088-4), 2016-03-31
Supplement: 13578_2016_88_MOESM1_ESM.pdf [file 13578_2016_88_MOESM1_ESM.pdf]

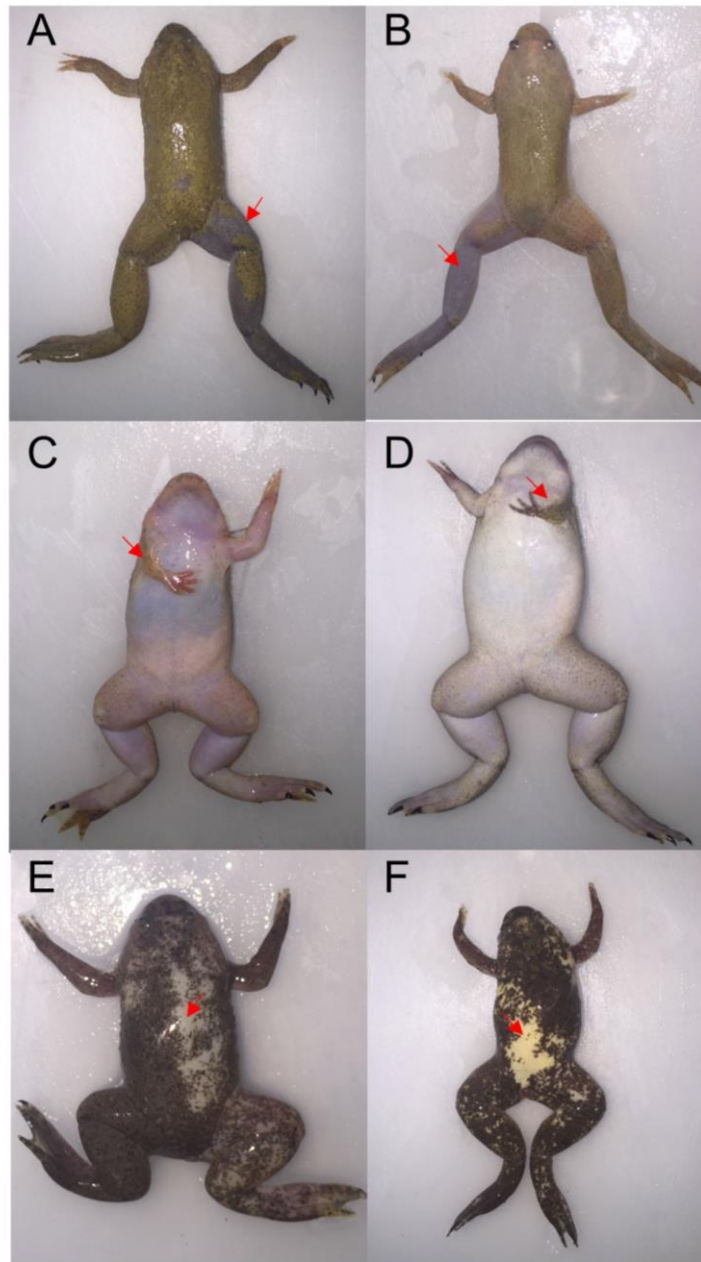

Supplementary Fig. 2

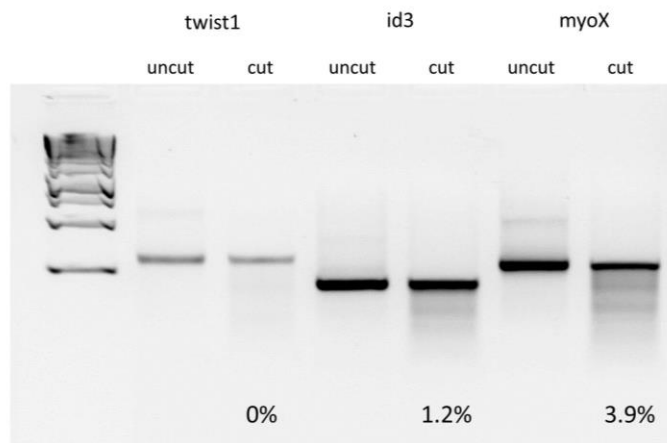

MyoX [%indel:3.9]

AATCATCTTGTAAGGGTTGACAGATGCCAGGATGGAGCCAATATATGTCTG

AATCATCTTGTAAGGGTTGACAGATGCCAGGATGGAGCCAATATATGTCTG

[x9]

Supplementary Fig. 3

**AP2α-963 (0/10)**  
AGTATAGGATCTGCTGGATAGCGCACCAGGTCTCAGGGTCCCACTAAGGGT WT  
AGTATAGGATCTGCTGGATAGCGCACCAGGTCTCAGGGTCCCACTAAGGGT [x10]

**zic1-645 (0/11)**  
CCCCACCCCTTCATACATGGGTCTGGGCTTCTCTGTGGTGCCTGCACGAGGT WT  
CCCCACCCCTTCATACATGGGTCTGGGCTTCTCTGTGGTGCCTGCACGAGGT [x11]

**ets1-302 uninjected**  
CCATCCCTTTCAATGGCATCTCCAGGGCTGAGTGAGGGTGCCTCACA CT C  
CCATCCCTTTCAATGGCATCTCCAGGGCTG---GAGGGTGCCTCACA CT C (-3)  
CCATCCCTTTCAATGGCATCTCCAGGGCTGAGTcGAGGGTGCCTCACAa (+3) [x2]  
CCATCCCTTTCAATGGCATCTCCAGGaCTaGAGTcGAGGGTGCCTCACAa (+3)

**ets1-302 (5/5)**  
CCATCCCTTTCAATGGCATCTCCAGGGCTGAGTGAGGGTGCCTCACA CT C WT  
CCATCCCTTTCAATGGCATCTCCAGGGCTG---GAGGGTGCCTCACA CT C (-3) [x2]  
CCATCCCTTTCAATGGCATCTCCAGGGCTGAGTcGAGGGTGCCTCACA CT C (+2) [x2]  
CCATCCCTTTCAATGGCATCTCCAGGaCTaGAGTcGAGGGTGCCTCACA CT C (-1, +3)

**Irig3-E306 (3/5)**  
TTGTTTGGGAAAAATAAGAGGATTTCATGGAAATGGGCATTTAAAAAATGA WT  
GAGGATTCATGGAAatgggca...//...ttcatggaAATGGGCATTTAAAAA (+135) [x2]  
GAGGATTCATGGAAatgggca...//...ttcatggaAATGGGCATTTAAAAA (+134)  
TTGTTTGGGAAAAATAAGAGGATTTCATGGAAATGGGCATTTAAAAAATGA [x2]

**sox9-826 (11/11)**  
AAAAACATGGATCTGGAAGTGAATAAGGAGACAGGGGTGTCCCCTCTAACC WT  
AAAAACATGGATCTGG-----AACC (-31)  
AAAAACATGGTtaG-----GGGGTGTCCCCTCTAACC (-21, +2)  
AAAAACATGGATCTGGAAGTGAATAAGG-----AGGGGTGTCCCCTCTAACC (-4)  
AAAAACATGGATCTGGAAGTGAATAAGGAGA-----GGTGTCCCCTCTAACC (-4)  
AAAAACATGGATCTGGAAGTGAATAAGGAGAGAGGGGTGTCCCCTCTAACC (-1, +1) [x7]

**sox9-579 (2/5)**  
GCAACAGTGGAGAGAGAGGTGAAAAAGGAGACAGAGGCGCAAAAAGGAGAAC WT  
GCAACAGTGGAGAGAGAGGTGAAAAAGGAGAG-----aCGCAAAAAGGAGAAC (-6, +1) [x2]  
GCAACAGTGGAGAGAGAGGTGAAAAAGGAGACAGAGGCGCAAAAAGGAGAAC [x3]

**sox9-600 (5/5)**

AAACCGCAGAGCCTGAAGCTGAAGAAGGAACAGGGGGGACTGGTTCTCCG WT  
AAACCGAAATGCAT-----//-----GCCAGCAGTCTCCG (-66)  
AAACCGTGCTAGCA-----//-----AGGGGGGACTGGTTCTCCG (-34)  
AAACCGCAGAGCCTGAAGCTGAAGAA-----GGACTGGTTCTCCG (-11)  
AAACCGCAGAGCCTGAAGCTGAAGAAGGA-----GACTGGTTCTCCG (-9)  
AAACCGCAGAGCCTGAAGCTGAAGAAGGA-----GGACTGGTTCTCCG (-7)

**sox9-766 (4/4)**

AAACCGCAGAGCCTGAAGCTGAAGAAGGATACAGGGGGGACTGGTTCTCCG WT  
AAACCGCAGAGCCTGAAGCTGAAGAAGGA-----GACTGGTTCTCCG (-9) [x2]  
AAACCGCAGAGCCTGAAGCTGAAGAAGGA-----GGGACTGGTTCTCCG (-6)  
AAACCGCAGAGCCTGAAGCTGAAGAAGGAACAGGGGGGACTGGTTCTCCG (-1, +1)

**sox9-794 (4/4)**

AAACTGCAGAGCCTGAAGCTGAAGAAGGACAGGGGGGACTGGTTCTCCG WT  
AAACTGCAGAGCCTGAAGCTGAAG-----GGGGGACTGGTTCTCCG (-9)  
AAACTGCAGAGCCTGAAGCTGAAGAAGGAG-----CAGGGGGACTGGTTCTCCG (-1)  
AAACTGCAGAGCCTGAAGCTGAAGAAGGATACAGGGGGGACTGGTTCTCCG (-1, +1) [x2]

**sox9-807 (5/5)**

ACGTTTTTTTTTGCAGCAGCTAAAGAAGGAGACAGAGGCAGCTTGCTGCAGA WT  
ACGTTTTTTTTT-----GAGGCAGCTTGCTGCAGA (-22)  
ACGTTTTTTTTTGCAGCAGCTAAAaAaAaAaAa-----//---AGAGTGCAGA (-20, +5)  
ACGTTTTTTTTTGCAGCAGCTAAAGAAGG---gGAGGCAGCTTGCTGCAGA (-5, +1)  
ACGTTTTTTTTTGCAGCAGCTAAAGAAGG---AGAGGCAGCTTGCTGCAGA (-4)  
ACGTTTTTTTTTGCAGCAGCTAAAGAAGGAGaCAGAGGCgGCTTGCTGCAGA (-1, +2)

**sox9-815 (5/5)**

GGGGCCTCTACTGGGGAGGTGAAGAAGGAGACAGGGGCCATTGGGGGGGTG WT  
GGGGCCTCTACTG-----GGGGCCATTGGGGGGGTG (-19)  
GGGGCCTCaACTGGtAAGGtAAGAAGG-GACcctGGGcctAGGGGGGTG (-10, +9)  
GGGGCCTCTAGTttAAGGtAAGAAGGAGtCAGGGGCCATTGGGGGGGTG (-6, +6)  
GGGGCCTCTACTGGGGAGGTGAAGAAGGA-----GGCCagtctgATGGGG (-5, +5)  
GGGGCCTCTACTGGGGAGGtAAGAAGGAGAtgCAttGGGgggatGCCAGG (-1, +10)

Supplementary Fig. 4

A

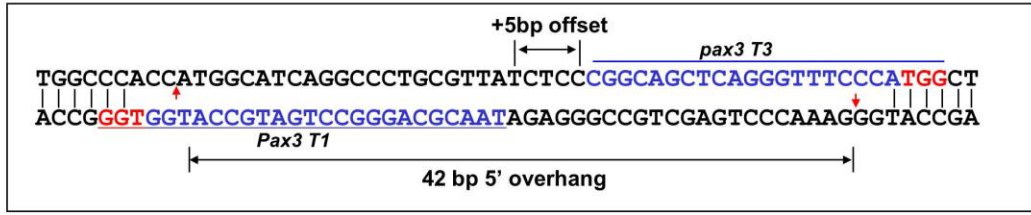

B

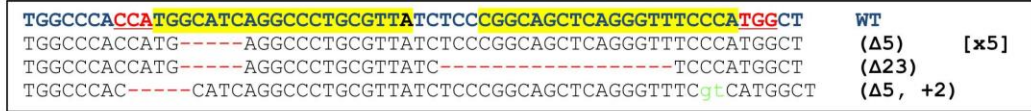

C

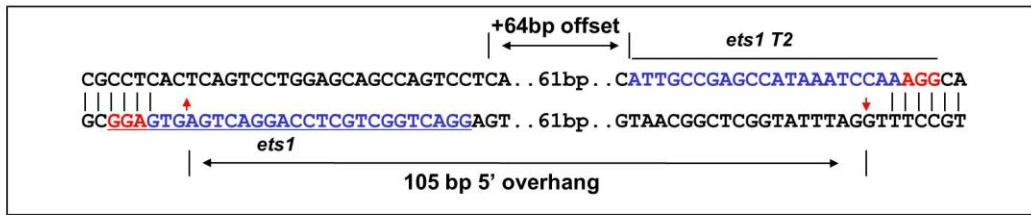

D

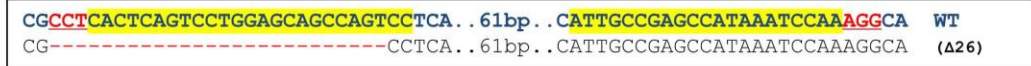

Supplementary Fig. 5

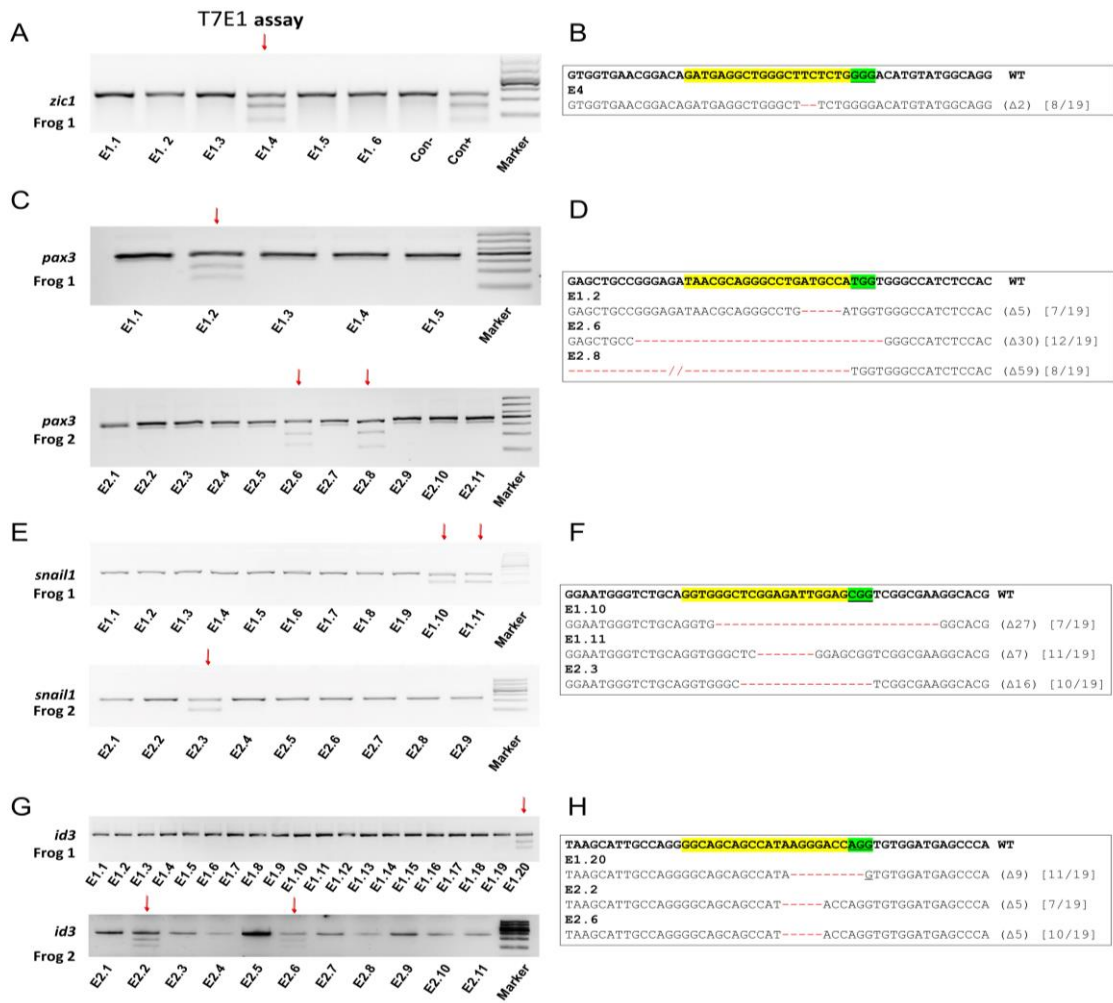

Supplementary Fig. 6

| Gene               | Target sequence (5'-3') | PAM        | Oligonucleotide 1 (5'-3') | Oligonucleotide 2 (5'-3') |
|--------------------|-------------------------|------------|---------------------------|---------------------------|
| <i>pax3</i>        | TACGCAGGGCCTGATGCCA     | TGG        | TAGGTAACGCAGGGCCTGATGCCA  | AAACTGGCATCAGGCCCTGCCTTA  |
| <i>pax3 T2</i>     | GGGCTAATTCAGGGCCAGAC    | TGG        | TAGGGCTAATTCAGGGCCAGAC    | AAACGTCTGGCCCTGAATTAGC    |
| <i>pax3 T3</i>     | CGGCAGCTCAGGGTTTCCCA    | TGG        | TAGGCGGCAGCTCAGGGTTTCCCA  | AAACTGGGAAACCCCTGAGCTGCCG |
| <i>ctnnb</i>       | GGAAAGCAGCAGTCAGTCAC    | TGG        | TAGGAAAGCAGCAGTCAGTCAC    | AAACGTGACTGACTGCTGCTTT    |
| <i>zic1</i>        | GATGAGGCTGGGCTTCTCTG    | GGG        | TAGGATGAGGCTGGGCTTCTCTG   | AAACCAGAGAAGCCCAGCCTCAT   |
| <i>ap2a</i>        | GGGATACCGCACCAGCTCTC    | TGG        | TAGGGATACCGCACCAGCTCTC    | AAACGAGAGCTGGTGGCGTATC    |
| <i>c-myc</i>       | GGAGATGGTGACCGAATTCC    | TGG        | TAGGAGATGGTGACCGAATTCC    | AAACGGAATTCGGTCACCATCT    |
| <i>snail1</i>      | GGTGGGCTCGGAGATTGGAG    | CGG        | TAGGTGGGCTCGGAGATTGGAG    | AAACCTCCAATCTCCGAGCCCA    |
| <i>snail1 T2</i>   | GGGGGTGGGATTGGGGTGGG    | AGG        | TAGGGGTGGGATTGGGGTGGG     | AAACCCACCCCAATCCACCCCC    |
| <i>snail2</i>      | GGAGAGCCCCATCAGCGATG    | AGG        | TAGGAGAGCCCCATCAGCGATG    | AAACCATCGCTGATGGGGCTCT    |
| <i>tyr</i>         | GGAAGTGGCCCTGCAAACA     | TGG        | TAGGAAGTGGCCCTGCAAACA     | AAACTGTTTGAGGGGCCAGTT     |
| <i>foxD3</i>       | GGACATCGATGTGGTGGGCG    | AGG        | TAGGACATCGATGTGGTGGGCG    | AAACCGCCACCACATCGATGT     |
| <i>sox9</i>        | GGAGCTGAAGAAGGAGACAG    | AGG        | TAGGAGCTGAAGAAGGAGACAG    | AAACCTGTCTCCTTCTTACGCT    |
| <i>sox9 T2</i>     | TTGGGGAAAGTGTCTCTTG     | GGG        | TAGGTTGGGGAAAGTGTCTCTTG   | AAACCAAGAGAACACTTTCCCCAA  |
| <i>ets1</i>        | GGCTGCTCCAGGACTGAGTG    | AGG        | TAGGCTGCTCCAGGACTGAGTG    | AAACCACTCAGTCTGGAGCAG     |
| <i>ets1 T2</i>     | TTGCCGAGCCATAAATCCAA    | AGG        | TAGGTTGCCGAGCCATAAATCCAA  | AAACTTGATTTATGGCTCGGCAA   |
| <i>ets2</i>        | GGCCGCCAAGGAATTCTCCT    | TGG        | TAGCCGCCAAGGAATTCTCCT     | AAACAGGAGAATTCTTGGCGG     |
| <i>id3</i>         | GGCAGCAGCCATAAGGGACC    | AGG        | TAGGCAGCAGCCATAAGGGACC    | AAACGGTCCCTTATGGCTGCTG    |
| <i>inca</i>        | GGGTTCCTCCAGTCACGACA    | AGG        | TAGGGTTCCTCCAGTCACGACA    | AAACTGTCGTGACTGGAGGAAC    |
| <i>lrig3</i>       | TGAAGATGATTCATGGAAC     | GGG        | TAGGTGAAGATGATTCATGGAAC   | AAACAGTTCATGAATCATCTTCA   |
| <i>lrig3 3'UTR</i> | GGGATTTTCTATTAAAATA     | AGG        | TAGGTATTCATCTTGAATGTACA   | AAACTGTACATCCAAGATGAATA   |
| <i>myoX</i>        | GGTTGACAGATGCCAGGATG    | <b>GAG</b> | TAGGTTGACAGATGCCAGGATG    | AAACCATCCTGGCATCTGTCAA    |
| <i>id3</i>         | GGCAATGCTTAGACTCTGCT    | <b>CAG</b> | TAGGCAATGCTTAGACTCTGCT    | AAACAGCAGAGTCTAAGCATTG    |
| <i>twist1</i>      | GGGATCCTCAGGGCTTTTCC    | <b>TAG</b> | TAGGGATCCTCAGGGCTTTTCC    | AAACGGAAAAGCCCTGAGGATC    |

Supplementary Table 1



| <b>primers for T7E1 assay and colony PCR at the target sites with PAM -NGG</b> |                          |                          |                       |
|--------------------------------------------------------------------------------|--------------------------|--------------------------|-----------------------|
| <b>Target gene</b>                                                             | <b>Primer 1</b>          | <b>Primer 2</b>          | <b>Primer 3</b>       |
| <i>pax3</i>                                                                    | GCTGACAGGACCCAGGACTAA    | CAGGGCCTGATGCCATG        | CGCAGGAGAGTGTGAGAGCTT |
| <i>ctnnb</i>                                                                   | AATGGAGCTGGACATGGCC      | GGAAAGCAGCAGTCAGTCAC     | CTGAGAGAAACCTTGCTCCCA |
| <i>zic1</i>                                                                    | TGATTTTCCCAGGTCTCCA      | GAGGCTGGGCTTCTCTGG       | GGCTGCCTCATGTAACGAA   |
| <i>ap-2a</i>                                                                   | CGCCCTACCAGCCAATAT       | CGGGGGATACCGCACCAGC      | GTATGGAGTGTAAAGGCAGGT |
| <i>c-myc</i>                                                                   | CCAGCAAAGCCGACTGCA       | CGAGAAGCCGCTCCACATA      | CAGCTGGAGATGGTGACCG   |
| <i>snail</i>                                                                   | GAAATTGCCGACTGTCCCC      | TGGGCTCGGAGATTGGAG       | TGCACCTGTTCCTCGT      |
| <i>snai2</i>                                                                   | AGCGATCTCTCCCCCTCT       | AGTCTTTCCTCCTCATCGCT     | TGTGCTTAGCCAACCCAGA   |
| <i>tyr</i>                                                                     | ATGGTCCCTCTGGCATTCT      | CCTCCATGTTTGCAGGGGCC     | CATTGGCACGTCTGTGTGA   |
| <i>foxD3</i>                                                                   | GCCCTGCCGAGCCTATTTT      | ACCACATCGATGTCCGCA       | CCGAGTTCGTCCGCTTCCT   |
| <i>sox9</i>                                                                    | CCAGCCGCTCAACTCTCT       | ACCCGGAGCTGAAGAAGGA      | GGCTTGCTCTTGCTGGAT    |
| <i>ets1</i>                                                                    | TTGGTGGGCAGGAATCATT      | CCTCACTCAGTCTGGAGC       | GTGTAGCCAGCTAGAGCAGC  |
| <i>ets2</i>                                                                    | CTGATCCCTTGCAGTGTGG      | AATTCACGTTTTCCAAGGAGA    | GGAAGACTGGCTCGTCCA    |
| <i>id3</i>                                                                     | AGCCATCAGCCAGTGAG        | AGGGCAGCAGCCATAAG        | TTCCCCAGGACTATCTGC    |
| <i>inca</i>                                                                    | TGGCATTGTGGAGGAGGA       | GTGGGTTCTCCAGTCAC        | AGACAGGCTGACAAGGAAGC  |
| <i>lrig3</i>                                                                   | CAATCTTTACATCCCCTTCC     | ACTGTCTTCAATCAATCCCAG    | CTGGTACAATTTGCAGTTTCA |
| <i>lrig3 3'utr</i>                                                             | GCTGGATACATAGCCGCATT     | GTATATTCATCTTGAATGTACATG | TGCAAGTGTACAAGGCTTACA |
| <b>primers for long fragment deletion and inversion assay</b>                  |                          |                          |                       |
| <i>pax3 ts1F</i>                                                               | ATGTGCTTTTGGTTGGCATT     |                          |                       |
| <i>pax3 ts1R</i>                                                               | CTGTGCGACTTGCAACAAC      |                          |                       |
| <i>pax3 ts2F</i>                                                               | GACTTTCAGGGGTGGATTTG     |                          |                       |
| <i>pax3 ts2R</i>                                                               | TGGGCTCTGTGTACTAGGG      |                          |                       |
| <i>snail ts1f</i>                                                              | GAGCAGAGAGGGCATGTAGG     |                          |                       |
| <i>snail ts1r</i>                                                              | GATTTTGGATGGTGCCTCTG     |                          |                       |
| <i>snail ts2f</i>                                                              | TTGTGCAAGTCCATTGTGGT     |                          |                       |
| <i>snail ts2r</i>                                                              | CTGTTTCTCGTGCTTGTGA      |                          |                       |
| <b>primers for colony PCR at the target sites with PAM -NAG</b>                |                          |                          |                       |
| <b>Target gene</b>                                                             | <b>Primer 1</b>          | <b>Primer 2</b>          | <b>Primer 3</b>       |
| <i>myoX</i>                                                                    | GCTGTCATACGCTACTTATCTGCT | GACAGATGCCAGGATGGAG      | ATTGTCATGACGCTCCACA   |
| <i>id3</i>                                                                     | CCCTGGCACCAACTCTTTTA     | AGCCATAAGGGACCAGGTG      | AAGCCATCAGCCAGTGA     |
| <i>twist1</i>                                                                  | CCCAGTCTCCCCAGTAGACA     | GATCCTCAGGGCTTTTCTAGT    | CTGCGAAGGCTTCATTTAGG  |

Supplementary Table 2

| On-target/<br>Off-target | Reference                               | Position       | Coding/<br>Non-coding | Sequence                              |
|--------------------------|-----------------------------------------|----------------|-----------------------|---------------------------------------|
| <b>Irig3 - exon2</b>     | <b>gi 288985368 ref NW_003163937.1 </b> | <b>608368</b>  | <b>C</b>              | <b>TGAAGATGATTCATGGA<u>ACTGGG</u></b> |
| Irig3-E306               | gi 288974306 ref NW_003174987.1         | 7525           | N                     | TAAAGAGGATTCATGGAAATGGG               |
| Irig3-E306               | gi 288974306 ref NW_003174987.1         | 7390           | N                     | TAAAGAGGATTCATGGAAATGGG               |
| <b>Irig3 - 3'UTR</b>     | <b>gi 288985368 ref NW_003163937.1 </b> | <b>620127</b>  | <b>N</b>              | <b>GGGATTTTTCTATTAA<u>ATAAGG</u></b>  |
| Irig3-U931               | gi 288985931 ref NW_003163374.1         | 2112551        | N                     | GGCATTTTTCTATTAAACAGGG                |
| Irig3-U890               | gi 288985890 ref NW_003163415.1         | 1856747        | N                     | TGAATTTTTCTATTAAATGGG                 |
| Irig3-U827               | gi 288985827 ref NW_003163478.1         | 1830431        | N                     | GAGATTTCTCTATCAAATATGG                |
| Irig3-U571               | gi 288985571 ref NW_003163734.1         | 752484         | N                     | TAGATTTTTCTATTAGAATAGGG               |
| Irig3-U967               | gi 288985967 ref NW_003163338.1         | 6705           | N                     | TGTATTATTCTATTAAATATGG                |
| Irig3-U967               | gi 288985967 ref NW_003163338.1         | 28014          | N                     | TGTATTATTCTATTAAATATGG                |
| <b>sox9</b>              | <b>gi 288985803 ref NW_003163502.1 </b> | <b>1305840</b> | <b>C</b>              | <b>GGAGCTGAAGAAGGAGACAG<u>AGG</u></b> |
| sox9-815                 | gi 288985815 ref NW_003163490.1         | 629385         | N                     | GGAGCTGAAGAAGGAGACAGGG                |
| sox9-807                 | gi 288984807 ref NW_003164498.1         | 90668          | N                     | GCAGCTAAAGAAGGAGACAGAGG               |
| sox9-794a                | gi 288985794 ref NW_003163511.1         | 655986         | N                     | GAGCTGAAGAAGGAGACAGGG                 |
| sox9-794b                | gi 288985794 ref NW_003163511.1         | 1172360        | N                     | GAGCTGAAGAAGGAGACAGGG                 |

|              |                                         |                |          |                                         |
|--------------|-----------------------------------------|----------------|----------|-----------------------------------------|
| sox9-826     | gi 288985826 ref NW_003163479.1         | 329806         | N        | GGA <u>ACTGAAT</u> AAGGAGACAG <u>GG</u> |
| sox9-766     | gi 288985766 ref NW_003163539.1         | 1033563        | N        | GAAGCTGAAGAAGGATACAG <u>GG</u>          |
| sox9-600     | gi 288985600 ref NW_003163705.1         | 294512         | N        | GAAGCTGAAGAAGGAAACAG <u>GG</u>          |
| sox9-863     | gi 288985863 ref NW_003163442.1         | 1884871        | N        | TGAGATGAAGCAGGAGACAG <u>AGG</u>         |
| sox9-579     | gi 288985579 ref NW_003163726.1         | 865328         | C        | AGAGCTGAAAAGGAGACAG <u>AGG</u>          |
| <b>foxd3</b> | <b>gi 288985975 ref NW_003163330.1 </b> | <b>5300676</b> | <b>C</b> | <b>GGACATCGATGTGGTGGGCG<u>AGG</u></b>   |
| foxd3-745    | gi 288985745 ref NW_003163560.1         | 849099         | N        | GGACA <u>GG</u> GATGTGGTGGG <u>GGGG</u> |
| <b>pax3</b>  | <b>gi 288985755 ref NW_003163550.1 </b> | <b>892370</b>  | <b>C</b> | <b>TAACGCAGGGCCTGATGCCAT<u>GG</u></b>   |
| pax3-534     | gi 288985534 ref NW_003163771.1         | 524010         | C        | TAAGGCATGTCTCTGATGCCA <u>CGG</u>        |
| <b>zic1</b>  | <b>gi 288985695 ref NW_003163610.1 </b> | <b>1003587</b> | <b>C</b> | <b>GATGAGGCTGGGCTTCTCTG<u>GGG</u></b>   |
| zic1-871     | gi 288985871 ref NW_003163434.1         | 1242807        | N        | GATCAAGCTGGGCTTCTCTGT <u>GG</u>         |
| zic1-905     | gi 288984905 ref NW_003164400.1         | 47502          | N        | CATTAGGCTGGGCTTCTCTG <u>GGG</u>         |
| zic1-645     | gi 288985645 ref NW_003163660.1         | 463191         | N        | CATGGGCTCTGGGCTTCTCTGT <u>GG</u>        |
| <b>AP2α</b>  | <b>gi 288985946 ref NW_003163359.1 </b> | <b>1109930</b> | <b>C</b> | <b>GGGATACCGCACCAGCTCTCT<u>GG</u></b>   |
| AP2α-963     | gi 288985963 ref NW_003163342.1         | 590383         | N        | TGGATAGCGCACCAGGTCTC <u>AGG</u>         |
| <b>inca</b>  | <b>gi 288985764 ref NW_003163541.1 </b> | <b>1385923</b> | <b>C</b> | <b>GGGTTCTCCAGTCACGACA<u>AGG</u></b>    |

|               |                                         |                |          |                                                    |
|---------------|-----------------------------------------|----------------|----------|----------------------------------------------------|
| inca-409      | gi 288985409 ref NW_003163896.1         | 408790         | N        | GTCTTCCTCCAGTCAC <u>CACAAGG</u>                    |
| <b>tyr</b>    | <b>gi 288985760 ref NW_003163545.1 </b> | <b>1213668</b> | <b>C</b> | <b>GGAAGTGGCCCCTGCAAACAT<u>G</u>G</b>              |
| tyr-813       | gi 288985813 ref NW_003163492.1         | 59728          | N        | GG <u>G</u> ACTGGCCCCTG <u>G</u> AAACA <u>A</u> GG |
| tyr-951       | gi 288985951 ref NW_003163354.1         | 442151         | N        | GGAGATGGCCCCTTCAAACAG <u>G</u> GG                  |
| <b>ctnnb</b>  | <b>gi 288985314 ref NW_003163991.1 </b> | <b>133962</b>  | <b>C</b> | <b>GGAAAGCAGCAGTCAGTCACT<u>G</u>G</b>              |
| ctnnb-835     | gi 288977835 ref NW_003171470.1         | 15844          | N        | GAAAGTAGCAGT <u>G</u> AGTCACT <u>G</u> GG          |
| <b>ets1</b>   | <b>gi 288985863 ref NW_003163442.1 </b> | <b>1450968</b> | <b>C</b> | <b>GGCTGCTCCAGGACTGAGTGAG<u>G</u></b>              |
| ets1-302      | gi 288984302 ref NW_003165003.1         | 3417           | N        | GGC <u>A</u> TCTCCAGG <u>G</u> CTGAGTGAG <u>G</u>  |
| <b>ets2</b>   | <b>gi 288985577 ref NW_003163728.1 </b> | <b>296233</b>  | <b>C</b> | <b>GGCCGCCAAGGAATTCTCCT<u>T</u>G</b>               |
| <b>c-myc</b>  | <b>gi 288985584 ref NW_003163721.1 </b> | <b>1036894</b> | <b>C</b> | <b>GGAGATGGTGACCGAATTCTCCT<u>G</u></b>             |
| <b>id3</b>    | <b>gi 288985873 ref NW_003163432.1 </b> | <b>2578641</b> | <b>C</b> | <b>GGCAGCAGCCATAAGGGACC<u>A</u>G</b>               |
| <b>snail1</b> | <b>gi 288985931 ref NW_003163374.1 </b> | <b>1055144</b> | <b>C</b> | <b>GGTGGGCTCGGAGATTGGAG<u>C</u>GG</b>              |
| <b>snail2</b> | <b>gi 288985896 ref NW_003163409.1 </b> | <b>625775</b>  | <b>C</b> | <b>GGAGAGCCCCATCAGCGATGAG<u>G</u></b>              |

Supplementary Table 3

| Off-target sites | Forward Primer             | Reverse Primer            |
|------------------|----------------------------|---------------------------|
| pax3-534         | GTTTGCTATCATTTCGATTGGAAG   | CAAGACACTGGCTCTGAATGTGAC  |
| zic1-871         | AAGCTGACTGTATTATATCCCTTGAG | GGAGTTCAGTGGTGCCAGATG     |
| zic1-905         | TGGAACCATTAAGCAAGTGCC      | ACAAATATCAGGCATCAGATACGG  |
| lrig3-E306       | GGTCCTTCAGGAAATTAAGGTCC    | CGAATTTATGATGAACAGTTGCAG  |
| lrig3-U931       | AGTACTCCAGTTCTAGAGCATGCC   | AACCACTGCCATTATAAATCTTGC  |
| lrig3-U890       | TTCTGGATAACGGGTCCTATGC     | CAGCTATTTTGTGACAGAAATAGG  |
| lrig3-U827       | TTACATAACTGGCTACTGCTCATGG  | GTTGTGCTTCTTATAGCAGCTGAAC |
| lrig3-U571       | TTATTGGTTGCTATGGGTTACTGC   | AACCAACAAAACGTACACCATTTG  |
| lrig3-U967       | CACAACAGCAGGTCTTTGACTACC   | TGTTCCAGGAGACCATAGACC     |
| ctn nb-835       | TAGCTAAATAGCTGCACATACGCTC  | AATCATGTTACTGACTTGTGCTC   |
| ets1-302         | CCAGTTTTACCTGTACCCTGATCTC  | ATCCCATGTGTTTGGACAGCTAC   |
| inca-409         | CTGTATGCCCAATGTATGTAACCC   | AGAAATTCAGTCTAATCCATAGCC  |
| ap2a-963         | AGCACTAAGTATTTGCTGAGTGCTG  | TACAGGGATCTTGTTACCATTTGTG |
| foxD3-745        | ATTTCTCTCCAAATTATTCTAGGCC  | TATTGCCAATGGATTTGCTACC    |
| tyr-813          | CAAACTTACTCTTGCCAATACCAC   | AGCACCTTGATGGCTTTTAATATC  |
| tyr-951          | GTCCAATGCTCTTCATATCATTGG   | CATCTCATCATGAAACGTAGAGACC |
| sox9-815         | TGCCCTAACTTACTCAGCAGGTAC   | GATGCTAGAAAGTAAAGGTGGGC   |
| sox9-807         | AGAAAATGCAGGCTTGTAACCTTAC  | ATATGAGCTATACATACAGGGCAGC |
| sox9-794         | GGATTTGGAAGAAGATGGCAAC     | GAATGTCGGGGGTGTGTTAATC    |
| sox9-826         | TTACCCACACCTTGAGATAAGG     | CTCTTCCCATCCCATCTGAC      |
| sox9-766         | ATGTTCTTGATTTGGAAGAAG      | AAGCTGGTTAAGAAGAAAATGTTTC |
| sox9-600         | TCCGAATTCAGTGGAAGAGAGAG    | TTCTGCAGTTTGCCTAAAAAGAAG  |
| sox9-863         | ATTGTCTGCTCAGCAATTTAAAATG  | TTCGCTTGGTGCTACTTCTACTG   |
| sox9-579         | TGAAACTACCTGAAATAATGTTGGC  | CTGTTTGCTATGGGTTGAAGACC   |

**Supplementary Table 4**

**Supplementary Fig. 1. Sequences of somatic mutations induced by Cas9 and corresponding sgRNAs in *X. tropicalis* G0 embryos.** The 2NLS indicates the sgRNAs were injected together with *Cas9-2NLS*. The sequences in bold are the wild type sequences, and the mutated regions are shaded in gray. The letters highlighted in yellow are the target sites, the letters in green are the PAMs. Red dashes indicated deletions ( $\Delta$ ), while low letters in blue represent insertions (+). The numbers in parentheses showed the number of deleted or inserted base pairs, while numbers in square brackets show the frequencies of the mutations in the sequenced samples.

**Supplementary Fig. 2. CRISPR/Cas9 mediated mosaic gene knockout G0 *Xenopus*.** (A-D) Pigmentary defects (A, B) or paralyzed upper limb (C, D) induced by coinjection of *Cas9* mRNA and *pax3* sgRNA. (E, F) loss of pigments caused by coinjection of *Cas9* mRNA and *tyrosinase (tyr)* sgRNA.

**Supplementary Fig. 3. NAG is not an effective PAM sequence in *Xenopus* embryos.** T7E1 result showing the mutation efficiency induced by sgRNA (with NAG as PAM) and *Cas9* at *twist1*, *id3* and *myosin X* genes. Genomic sequence of targeted *myosin X* locus is highlighted in yellow, PAM was in green/purple and underlined. PCR fragments of *myosin X* of 3.9% mutation rate were subcloned into the T-vector. However, none of the sequenced colonies harboured mutations at the *myosin X* locus (myoX, myosin X).

**Supplementary Fig. 4. DNA sequences of off-target mutations induced by CRISPR/Cas9.** For all the panels, wild types of off-target sites are shown on the top. sgRNA-DNA interface sequences are highlighted in yellow, while PAMs are in yellow and underlined. Red dashes indicate deletions (-) and lowercase letters in red indicate insertions (+) or substitutions. All the indels are highlighted in gray. The numbers in parentheses show the number of indels in all sequence number, whereas numbers in square brackets show the frequencies of the mutations in all the sequenced samples.

**Supplementary Fig. 5. Double nicking induced genome editing in the loci of *pax3* and *ets1*.** (A, C) sgRNA pairs targeting sites in the loci of *pax3* (A) or *ets1*(C). Letters in blue are the target sites and the PAMs are highlighted in red. The offset indicates

the base pairs between the 5' ends of two target sites. The 5' overhang indicates the base pairs between the cutting sites of Cas9 induced by two sgRNAs. (B, D) Sequencing data of the target sites in the loci of *pax3* (B) or *ets1* (D) induced by D10A with double nicking. Red dashes indicate the deletions. Lowercase letters indicate the insertions.

**Supplementary Fig. 6. Germline transmission of mutant G0 *Xenopus*.** The G0 frogs harboring disrupted genes as indicated were crossed with wild type frog, respectively. The genomic DNA extracted from individual embryos was PCR amplified, and then analyzed by T7E1 assay (A, C, E, G). The positive PCR amplicons were TA-cloned into pMD-18T and followed by sequencing to confirm germ line transmission of mutations (B, D, F, H). Letters in bold indicate wild type sequence, and PAM sequences were underlined. Red dashes indicate deletions. For each heterozygous embryo, 19 clones were selected randomly for sequencing. Red arrows indicated the DNA samples from embryos that harbor mutations. Con- or Con+, PCR products harboring mutations without or with T7E1 treatment.

**Supplementary Table 1. The target sites, PAM and oligos of each locus.** The DNA sequences with the NGG PAM targeted in this study and oligonucleotides used to subclone the spacer sequences into the sgRNA expression vector. In some cases, extra nucleotides GG were added to the oligo1 to complement the BsaI cloning site on the sgRNA expression vector. NAG PAMs were shown in bold.

**Supplementary Table 2. Primers used in this study for identifying target site mutations in T7E1 assay and colony PCR.** All of the primer sequences are written in 5'- 3', from left to right.

**Supplementary Table 3. The potential off-target sites of the 16 loci knocked out in this study.** The sequences in bold font is the target sites. The PAMs are underlined. The mismatched nucleotides in off-target sites are highlighted in red.

**Supplementary Table 4. Primers used in this study for identifying off-target effect by T7 Endonuclease 1 and colony PCR in T7E1 and colony PCR.** All of the primer sequences are written in 5'- 3', from left to right.
